# Supplementary material for: Clinical significance and applications of oscillometry
Source: PubMed Central journal article supplement — Eur Respir Rev. 2022 Feb 9;31(163):210208. doi: 10.1183/16000617.0208-2021 (PMC9488764; doi:10.1183/16000617.0208-2021), 2022-02-09
Supplement: ERR-0208-2021.SUPPLEMENT.pdf [file ERR-0208-2021.SUPPLEMENT.pdf]

## Clinical Significance and Applications of Oscillometry – Supplementary Material

David A. Kaminsky<sup>1#†</sup>, Shannon J. Simpson<sup>2#</sup>, Kenneth I. Berger<sup>3</sup>, Peter Calverley<sup>4</sup>, Pedro L. de Melo<sup>5</sup>, Ronald Dandurand<sup>6</sup>, Raffaele L. Dellacà<sup>7</sup>, Claude S. Farah<sup>8</sup>, Ramon Farré<sup>9</sup>, Graham L. Hall<sup>2</sup>, Iulia Ioan<sup>10</sup>, Charles G. Irvin<sup>1</sup>, David W. Kaczka<sup>11</sup>, Gregory G. King<sup>12</sup>, Hajime Kurosawa<sup>13</sup>, Enrico Lombardi<sup>14</sup>, Geoffrey N. Maksym<sup>15</sup>, François Marchal<sup>10</sup>, Ellie Oostveen<sup>16</sup>, Beno W. Oppenheimer<sup>3</sup>, Paul Robinson<sup>17</sup>, Maarten van den Berge<sup>18</sup> and, Cindy Thamrin<sup>19</sup>

# These authors have contributed equally to this manuscript

1. Department of Medicine, Pulmonary and Critical Care Medicine, University of Vermont, Larner College of Medicine, Burlington, Vermont, USA.
2. Children's Lung Health, Telethon Kids Institute; School of Allied Health, Curtin University, Perth, Australia.
3. Division of Pulmonary, Critical Care, and Sleep Medicine, NYU School of Medicine and André Cournand Pulmonary Physiology Laboratory, Bellevue Hospital, New York, USA.
4. Institute of Ageing and Chronic Disease, University of Liverpool, Liverpool, UK.
5. Institute of Biology and Faculty of Engineering, Department of Physiology, Biomedical Instrumentation Laboratory, State University of Rio de Janeiro, Rio de Janeiro, Brazil.
6. Lakeshore General Hospital, Pointe-Claire, Canada and Montreal Chest Institute, Meakins-Christie Labs, Oscillometry Unit and of the Centre for Innovative Medicine, McGill University Health Centre and Research Institute, and McGill University, Montreal, Canada
7. Dipartimento di Elettronica, Informazione e Bioingegneria – DEIB, Politecnico di Milano University, Milano, Italy.
8. Department of Respiratory Medicine, Concord Repatriation General Hospital, Sydney, Australia
9. Unitat de Biofísica i Bioenginyeria, Facultat de Medicina, Universitat de Barcelona-IDIBAPS, Barcelona, Spain and CIBER de Enfermedades Respiratorias, Madrid, Spain.
10. Department of Pediatric Lung Function Testing, Children's Hospital, Vandoeuvre-lès-Nancy, France; EA 3450 DevAH – Laboratory of Physiology, Faculty of Medicine, University of Lorraine, Vandoeuvre-lès-Nancy, France
11. Departments of Anesthesia, Biomedical Engineering and Radiology, University of Iowa, Iowa City, Iowa, USA.
12. The Department of Respiratory Medicine and Airway Physiology and Imaging Group, Royal North Shore Hospital and The Woolcock Institute of Medical Research, The University of Sydney NSW 2006, Australia.
13. Department of Occupational Health, Tohoku University School of Medicine, Sendai, Japan
14. Pediatric Pulmonary Unit, Meyer Pediatric University Hospital, Florence, Italy.
15. School of Biomedical Engineering, Dalhousie University, Halifax, NS B3H 4R2, Canada.
16. Department of Respiratory Medicine, Antwerp University Hospital and University of Antwerp, Belgium.
17. Woolcock Institute of Medical Research, Children's Hospital at Westmead, Sydney, Australia
18. University of Groningen, University Medical Center Groningen, Department of Pulmonary Diseases, Groningen, The Netherlands
19. Woolcock Institute of Medical Research, The University of Sydney, Sydney, Australia

†Corresponding Author:

David A. Kaminsky, M.D.  
Professor of Medicine  
Pulmonary Disease and Critical Care Medicine  
University of Vermont College of Medicine  
Given D-213, 89 Beaumont Avenue  
Burlington, VT 05405 USA  
Tel +1 (802) 656-3523  
Fax +1 (802) 656-3526  
email: david.kaminsky@uvm.edu

### Special Considerations Related to Interpreting Oscillometry

Useful physiological and pathological information from oscillometry can be obtained from the dependence of the frequency of oscillation. Most clinical oscillometric studies in children and adults have been conducted over relatively medium frequency ranges (between 4 to 50 Hz), although low frequency (less than 1 Hz) and high frequency (greater than 50 Hz) ranges have also been studied, particularly in infants. Much of the published literature has reported on whole-breath analysis to derive  $Z_{rs}$ , but there is increasing interest in “intra-breath” applications where a single frequency is used to track the breathing cycle temporally (1, 2). Additionally, the important effects of lung volume on oscillatory mechanics need to be better appreciated (3).  $R_{rs}$  has an inverse relationship with lung volume, particularly at low lung volumes where  $R_{rs}$  increases substantially. In children, this volume-dependence of  $R_{rs}$  is magnified in the presence of airway obstruction (4). The relationship between  $X_{rs}$  and lung volume is more complex, such that  $X_{rs}$  suddenly and abruptly decreases at low lung volumes due to airway closure (5-8). Such volume-dependent behaviours are best explained by parenchymal tethering of the airways, which allows lung inflation to increase airway calibre, or airway closure to occur during lung deflation. An understanding of these physiological relationships facilitates the clinical interpretation of

oscillometry measurements as the clinical relevance of this lung function modality continues to mature.

### Oscillometry During Infancy

The vast majority of studies in infants have applied oscillations at raised lung volume during a period of apnoea, induced via the Herring-Bruer reflex. In infants, the equilibrium between tissue properties, lung volume, airway wall compliance, and airway diameter is highly complex and dynamically interacting (9). Consequently, oscillations outside of the medium frequency range have been applied to infants in an attempt to further understand the early origins of lung disease. For example, Zrs at low frequencies (below 1-2 Hz) contains information on both the resistive and elastic properties of the respiratory tissues (i.e., the parenchyma and chest wall) (10), as shown during methacholine challenge (11) and bronchodilator administration (12, 13) in wheezy and “healthy” infants. Similar low-frequency methods have been applied to a small number of preterm infants (14), but the clinical interpretation remains unclear.

High frequency oscillations (above 50Hz), which contains information on the airway wall properties, have also been applied to infants. These data reveal that the first anti-resonance (when the impedance is wholly due to resistance rather than reactive components which include elastic and inertial contributions) is altered in asymptomatic infants with wheezing disorders (15), consistent with changes in mechanical properties of the airway walls. Since both airway diameter and airway wall mechanics contribute to flow limitation (16) these findings support the notion that the mechanical properties of the airway walls may play a role in recurrently wheezing infants at baseline, as well as post-beta-agonist inhalation (17).

Most recently, oscillometry has been applied to infants during quiet sleep, utilizing medium frequency spectral analyses and the single frequency (intra-breath) method, with successful measurements obtained as early as the first day of life (18-20). This method has been applied to unsedated healthy infants at 6 weeks of age, to identify subjects at risk of developing severe respiratory illness in the first year of life, including those with lower respiratory tract illnesses and wheezing (21). Further studies in this emerging research area are likely to determine the broader role of oscillometry in detecting infants (and children) who may go on to develop chronic respiratory disease (22).

#### Effects of Lung Volume on Oscillatory Mechanics in Asthma

Van den Elshout and colleagues (23) have observed different responses of Zrs to changes in lung volume between healthy and asthmatic adults with and without bronchial hyperreactivity. Such findings suggest that oscillometry might be a useful adjunct for the diagnosis of bronchial hyperreactivity. The relationship between volume-dependent indexes and asthma control may also prove to be clinically useful, with earlier closure associated with worse control (24). The volume at which Xrs suddenly becomes more negative is higher in asthma, indicating earlier airway closure (5). Nilsen and colleagues (7) proposed a simple and easily performed technique using a slow vital capacity manoeuvre, in conjunction with Xrs measurements, to identify the critical volume resulting in apparent closure of airspaces (derecruitment) in asthma.

Derecruitment is the effective closure of airways to the oscillatory flow, which prevents transmission of flow beyond the occlusion and results in an apparent stiffening of the respiratory system, manifested as a more negative Xrs at low frequency. More recent work identified lung

derecruitment patterns (8) and relationship to closing volume as measured by single breath gas washout (25). Airway re-opening during large tidal manoeuvres is a modulator of airway obstruction in adult asthmatics (26). These mechanisms may be even more relevant in children, in whom FRC and airway closing volume have closer proximity.

### Short and Long-Term Variability of Oscillometry in Asthma

Short-term variability (e.g., within-test or between-session on the same day) of oscillometry is greater than that seen with spirometry in children and adults (27, 28). As asthma is characterized by spontaneous variation in lung function over time (i.e., variable airflow obstruction), greater variability detected by oscillometry may have important clinical consequences. Que and colleagues showed greater variability of Zrs during a single 15 minute recording in adult asthmatics compared to healthy controls (29), and these findings have been replicated in some studies (30) but not others when log transformed (31). Veiga and colleagues (32) and Que and colleagues (29) demonstrated that this variability is proportional to airway obstruction. Gonem and colleagues (30), using a single 150-s recording of oscillometry, also reported higher Rrs and Rrs5-20 variability in asthmatics at Global Initiative for Asthma (GINA) (33) treatment steps 4 and 5, and with asthma exacerbation risk.

Longer time scale variation in lung function (i.e., over days or months) may also provide information on asthma control. Previous studies demonstrated that unsupervised home monitoring using oscillometry in adults yielded accurate and reproducible data (34-36), and that either the coefficient of variation or individualized standard deviations could be used to define day-to-day variability (28). In school-aged children, the variability of laboratory-measured Rrs

and Xrs over 5 days correlated with asthma control (37). More advanced methods may enable us to more adequately capture day-to-day variability of Rrs and Xrs obtained from home monitoring. Such analyses have predicted future deterioration in lung function, providing a potential measure of exacerbation risk (38, 39). Case studies provide promising evidence that home-based, parent-supervised, daily oscillometric measurements are predictive of future exacerbations in paediatric patients (40). Continuous, home-based monitoring with oscillometry to assess asthma control and to detect exacerbations is feasible and reliable in adults (39, 41). Greater day-to-day variability of Rrs and Xrs has been observed in mild-intermittent asthma versus health over days (28) as well as up to 6 months (42). The between-day variability of measurements is greater than that of FEV<sub>1</sub> (28, 43), which may reflect disease activity and the underlying physiological differences between oscillometry and spirometry (28, 43). These observations suggest a role for oscillometry as an objective and sensitive detector of asthma control and exacerbation, as well as a clinical indicator of exacerbation phenotype.

#### Upper Airway Shunt During Bronchial Challenge Testing

Upper airway shunting dampens any increase in Rrs during bronchial challenge testing, an effect that increases with greater lung impedance, such as in the presence of airway obstruction or in young children. This effect may be compensated for in part by using a “head generator”, or a different parameter derived from Zrs known as respiratory system admittance (Ars; the reciprocal of impedance i.e.,  $1/Zrs$ ) (44, 45). Ars represents the flow conductance of the total respiratory system, and corresponds closely to its predominating component, the bronchial conductance, especially when measured near resonant frequency.

### Home Monitoring of Oscillometry in Patients with COPD

As with asthma, home monitoring of COPD patients with oscillometry is feasible (34, 43, 46, 47) and has been used to try to identify clinical deterioration in patients at risk of exacerbation (48). Although there was no difference in the overall risk of hospitalization compared to usual care, patients with a prior history of hospitalization and/or severe COPD benefitted from daily oscillometry monitoring linked to clinical intervention as lung function deterioration was detected. Whether the sensitivity and specificity of this approach can be improved by including symptomatic monitoring in this process remains to be tested.

### The Use of Oscillometry in the Setting of CPAP for Obstructive Sleep Apnoea

In clinical settings of using oscillometry to monitor response to CPAP in OSA, oscillations should be applied through a nasal mask and tubing, with pressure and flow sensors not placed directly at the upper airway opening. Such technical modifications may require additional transducer calibrations and data corrections, as compared to conventional oscillometry delivered at the mouth in awake patients (49, 50). Interestingly, it has been shown that generation of oscillation signals for such application does not require an apparatus specific for OSA measurement, since a CPAP device can easily be modified to incorporate oscillometric measurements (51). Since appropriate application of oscillometry does not disturb sleep and does not modify upper airway tone (52), the technique has been incorporated into commercially available CPAP devices (53) to titrate the level of CPAP (54) either manually or as part of an automated control system (55).

### Technical Aspects Related to Oscillometry in Mechanically Ventilated Patients

The measurement of impedance over lower frequencies encompassing typical ventilator rates usually requires interruption of artificial ventilatory support, although attempts have been made to estimate impedance from spectral analysis of standard volume-cycled waveforms (56, 57). Alternatively, various spectrally enhanced waveforms have been developed to allow for more robust and efficient measurement of low frequency impedance in ventilated patients (56, 58, 59). Some waveforms are even capable of maintaining gas exchange during the measurement (60, 61). If complete apnoea is required during measurement (to assess low frequency Zrs), the use of neuromuscular blockade may be considered in the patient who is appropriately sedated. Particular care must also be given to the instrumentation used for pressure and flow measurement at the airway, since it may easily become contaminated and non-functional due to secretions, especially mesh screen or capillary tube pneumotachographs (62). Should oscillometric measurements be acquired under varying concentrations of inspired oxygen or volatile anaesthetics, several calibrations of the flow sensor may be required to account for alterations in gas density or viscosity (63-65). The considerable nonlinear resistance of the endotracheal tube should be taken into account when measuring respiratory impedance in intubated patients (66-68).



Supplementary Table S1. Published reference values for Rrs and Zrs for healthy children and adults.

| <b>Author</b>         | <b>Year</b> | <b>N</b> | <b>Ethnicity<br/>or<br/>Country</b> | <b>Age<br/>(yrs)</b> | <b>Oscillometry<br/>Device</b> |
|-----------------------|-------------|----------|-------------------------------------|----------------------|--------------------------------|
| <i>Children</i>       |             |          |                                     |                      |                                |
| <i>Preschool</i>      |             |          |                                     |                      |                                |
| Hellinckx (69)        | 1998        | 247      | Cau                                 | 2-6                  | IOS                            |
| Malmberg(70)          | 2002        | 109      | Cau                                 | 2-7                  | IOS                            |
| Shackleton(71)        | 2013        | 584      | Mex                                 | 3-5                  | i2M                            |
| Er(72)                | 2019        | 151      | Turkey                              | 3-7                  | IOS                            |
| Duenas-Meza (73)      | 2019        | 96       | Columbia                            | 3-5                  | IOS                            |
| <i>Older Children</i> |             |          |                                     |                      |                                |
| Frei (74)             | 2005        | 222      | Cau                                 | 2-10                 | IOS                            |
| Ducharme (75)         | 2005        | 197      | Cau                                 | 3-17                 | Custovit                       |
| Dencker (76)          | 2006        | 360      | Cau                                 | 2-11                 | IOS                            |
| Amra (77)             | 2008        | 509      | Iranian                             | 5-19                 | IOS                            |
| Vu (78)               | 2008        | 175      | Viet                                | 6-11                 | Custom                         |
| Nowowiejska (79)      | 2008        | 626      | Cau                                 | 3-18                 | IOS                            |
| Hagiwara (80)         | 2013        | 537      | Jpn                                 | 6-15                 | IOS                            |
| Calogero (81)         | 2013        | 760      | Cau                                 | 2-13                 | i2M                            |
| Gochiocoa-Rangel (82) | 2015        | 283      | Mex                                 | 2-15                 | IOS                            |
| Kanokporn (83)        | 2017        | 233      | Thai                                | 3-7                  | i2M                            |
| AlBlooshi             | 2018        | 291      | UAE                                 | 4-12                 | tremoFlo                       |
| <i>Adults</i>         |             |          |                                     |                      |                                |

|               |      |     |                                      |        |           |
|---------------|------|-----|--------------------------------------|--------|-----------|
| Landser (84)  | 1982 | 407 | Cau                                  | -      | Custom    |
| Pasker (85)   | 1996 | 140 | Cau                                  | 21-81  | Custom    |
| Guo (86)      | 2005 | 223 | Cau                                  | 65-100 | Oscilink  |
| Shiota (87)   | 2005 | 299 | Jpn                                  | 20-83  | IOS       |
| Brown (88)    | 2007 | 904 | Cau                                  | 18-92  | Custom    |
| Newbury (89)  | 2008 | 125 | Cau                                  | 25-74  | IOS       |
| Oostveen (90) | 2013 | 368 | Cau                                  | 18-84  | multi*    |
| Schulz (91)   | 2013 | 397 | Cau                                  | 45-91  | IOS       |
| Abe (92)      | 2016 | 784 | Jpn                                  | 46-90  | MostGraph |
| Ribeiro (93)  | 2018 | 288 | Braz                                 | 20-86  | Custom    |
| Moitra (94)   | 2020 | 191 | India                                | 18-88  | IOS       |
| De (95)       | 2020 | 253 | India                                | 18-81  | IOS       |
| Berger (96)   | 2021 | 439 | Cau,<br>Black,<br>Asian,<br>Hispanic | 21-85  | IOS       |

N:  
number  
of

participants; Cau: Caucasians; Mex: Mexicans; Jpn: Japanese; Viet: Vietnamese; UAE: United Arab Emirates. \*: IOS, I2M, Oscilink, 2 Custom setups. IOS: Impulse Oscillometry System.

**Supplementary Table S2.** Threshold values for bronchodilator response derived from healthy children and adults.

| <b>Author/Year</b>   | <b>Age (yrs)</b> | <b>N*</b> | <b>Drug (dose)</b>    | <b>Oscillometry Index Cut-off</b>                               |
|----------------------|------------------|-----------|-----------------------|-----------------------------------------------------------------|
| Helinckx 1998 (69)   | 3-7              | 228       | Salbutamol (200 mcg)  | Rrs5: -41%                                                      |
| Nielsen 2001 (97)    | 2-6              | 37        | Terbutaline (500 mcg) | Rrs5: -29%, Xrs5: +42%                                          |
| Malmberg 2002 (70)   | 2-7              | 89        | Salbutamol (300 mcg)  | Rrs5: -37%                                                      |
| Thamrin 2007 (98)    | 4-5              | 78        | Salbutamol (600 mcg)  | Rrs6: -42%, Xrs6: +61%                                          |
| Oostveen 2010 (99)   | 4                | 144       | Salbutamol (200 mcg)  | Rrs4: -43%, AX: -81%                                            |
| Shin YH 2012 (100)   | 2-6              | 29        | Salbutamol (400 mcg)  | Rrs 5: -19%, Xrs5:+24%                                          |
| Calogero 2013 (81)   | 2-13             | 508       | Salbutamol (200 mcg)  | Rrs8: -32%, Xrs8: +65%, AX: -81%                                |
| Houghton 2004 (101)  | adult            | 12        | Salbutamol (800 mcg)  | Rrs5: -16%, Xrs5: +27%                                          |
| Houghton 2005 (102)  | adult            | 12        | Ipratropium (200 mcg) | Rrs5: -23%, Xrs5: +19%                                          |
| Ostveen 2013 (90)    | adult            | 368       | Salbutamol (400 mcg)  | Rrs5: -32%, Xrs: +44%, AX: -65%                                 |
| Johansson 2021 (103) | adult            | 1495      | Salbutamol (400 mcg)  | Rrs5: -29%; Xrs5: +45%                                          |
| Jetmalani 2021 (104) | adult            | 577       | salbutamol (200 mcg)  | Rrs6: -30%, -1.42 z-scores; Xrs6:0.57 cm H2O/L/s, 1.36 z-scores |

\* N: the number who received bronchodilator  
 Bronchodilator response is defined as ((post-pre)/pre)\*100.

Supplementary Table S3. Studies comparing cut-offs during bronchial challenge testing using oscillometry vs spirometry.

| Author/Year                | Population                                                | Oscillometry device          | Oscillometry index cut-off                                                                                                                                                                                                   |
|----------------------------|-----------------------------------------------------------|------------------------------|------------------------------------------------------------------------------------------------------------------------------------------------------------------------------------------------------------------------------|
| <i>Paediatric studies</i>  |                                                           |                              |                                                                                                                                                                                                                              |
| Lebecque 1987 (105)        | 17 children with AHR & 14 non-AHR                         | Oscillaire                   | 50% increase R6 with histamine                                                                                                                                                                                               |
| Bouaziz 1996 (106)         | 38 asthmatic children                                     | Pulmosfor 4-32Hz or 6 & 12Hz | 70% change R12 and 1 hPa.s.L <sup>-1</sup> decrease in X12 with methacholine                                                                                                                                                 |
| Jee 2010 (107)             | 50 asthmatic pre-school children & 41 children with cough | IOS                          | 80% decrease in X5 with methacholine                                                                                                                                                                                         |
| Bailly 2011(108)           | 227 children with suspected asthma                        | IOS                          | 50% decrease X5 with methacholine                                                                                                                                                                                            |
| Schulze 2012 (109)         | 48 children                                               | IOS                          | 45% increase in R5 or 0.69 kPa.s.L <sup>-1</sup> decrease in X5 to methacholine                                                                                                                                              |
| Jara-Gutierrez 2018. (110) | 190 children                                              | IOS                          | 22% increase in R5, 41% decrease in X5, 82% increase in AX (for methacholine); for mannitol: 18% increase in R5, 21% decrease in X5, 40% increase in AX; for EVH: 23% increase in R5, 29% decrease in X5, 40% increase in AX |
| <i>Adult studies</i>       |                                                           |                              |                                                                                                                                                                                                                              |

|                          |                                                          |                  |                                                                                                 |
|--------------------------|----------------------------------------------------------|------------------|-------------------------------------------------------------------------------------------------|
| van Noord 1989 (111)     | 53 adults                                                | Custom device    | 47% increase in R5 detecting 15% decrease in FEV1 to histamine                                  |
| J. Paireon 1994 (112)    | 119 adults with normal FEV1 from occupational screening. | Custom device    | 65% increase in R0 with methacholine                                                            |
| A.B. Bohadana 1999 (113) | 71 adults with suspected asthma                          | Pulmosfor 4-32Hz | 0.060 %rise R <sub>mean(4-32Hz)</sub> /μg carbachol (DRS) or 0.066 %rise R10/ μg carbachol      |
| M. McClean 2011 (114)    | 52 asthmatic and 15 healthy adults                       | Custom device    | 27% decrease in Grs6 or 0.93 cm H <sub>2</sub> O.s.L <sup>-1</sup> decrease in X6 with mannitol |
| Seccombe 2019. (115)     | 19 asthmatics and 10 controls                            | TremoFlo         | 27% increase in R5 and 47% decrease in X5 relative to 10% fall in FEV1 post-exercise            |

IOS – impulse oscillometry system; R0, R5, R6, R10, R12, X5, X12 – respiratory system resistance at a specified oscillation frequency.

## Supplementary References

1. Dellacà R, Santus P, Aliverti A, Stevenson N, Centanni S, Macklem PT, et al. Detection of expiratory flow limitation in COPD using the forced oscillation technique. *Eur Respir J*. 2004;23:232-40.
2. Hantos Z. Intra-breath oscillometry for assessing respiratory outcomes. *Current Opinion Physiol*. 2021;22:100441.
3. Fisher AB, DuBois AB, Hyde RW. Evaluation of the forced oscillation technique for the determination of resistance to breathing. *J Clin Invest*. 1968;47(9):2045-57.
4. Marchal F, Loos N, Monin P, Peslin R. Methacholine-induced volume dependence of respiratory resistance in preschool children. *European Respiratory Journal*. 1999;14(5):1167-74.
5. Kelly VJ, Brown NJ, Sands SA, Borg BM, King GG, Thompson BR. Effect of airway smooth muscle tone on airway distensibility measured by the forced oscillation technique in adults with asthma. *J Appl Physiol*. 2012;112(9):1494-503.
6. Mailot-Larouche S, Lachance M, Bullone M, Henry C, Dandurand RJ, Boutlet L-P, et al. Assessment of airway distensibility by the forced oscillation technique: Reproducible and potentially simplifiable. *Frontiers in Physiology*. 2017;8:223.
7. Nilsen K, Gove K, Thien F, Wilkinson T, Thompson BR. Comparison of two methods of determining lung de-recruitment, using the forced oscillation technique. *Eur J Appl Physiol*. 2018;118(10):2213-24.
8. Nilsen K, Thien F, Thamrin C, Ellis MJ, Prisk GK, King GG, et al. Early onset of airway derecruitment assessed using the forced oscillation technique in subjects with asthma. *J Appl Physiol (1985)*. 2019;126(5):1399-408.

9. Hall GL, Hantos Z, Sly PD. Altered respiratory tissue mechanics in asymptomatic wheezy infants. *Am J Respir Crit Care Med.* 2001;164(8 Pt 1):1387-91.
10. Sly PD, Hayden MJ, Petak F, Hantos Z. Measurement of low-frequency respiratory impedance in infants. *Am J Respir Crit Care Med.* 1996;154(1):161-6.
11. Hall GL, Hantos Z, Wildhaber JH, Petak F, Sly PD. Methacholine responsiveness in infants assessed with low frequency forced oscillation and forced expiration techniques. *Thorax.* 2001;56(1):42-7.
12. Hayden MJ, Petak F, Hantos Z, Hall G, Sly PD. Using low-frequency oscillation to detect bronchodilator responsiveness in infants. *Am J Respir Crit Care Med.* 1998;157(2):574-9.
13. Jackson AC, Neff KM, Dorkin HL, Lutchen KR. Interpretation of respiratory input impedance in healthy infants. *Pediatr Pulmonol.* 1996;22(6):364-75.
14. Pillow JJ, Stocks J, Sly PD, Hantos Z. Partitioning of airway and parenchymal mechanics in unsedated newborn infants. *Pediatr Res.* 2005;58(6):1210-5.
15. Frey U, Makkonen K, Wellman T, Beardsmore C, Silverman M. Alterations in airway wall properties in infants with a history of wheezing disorders. *Am J Respir Crit Care Med.* 2000;161(6):1825-9.
16. Ward C, Johns DP, Bish R, Pais M, Reid DW, Ingram C, et al. Reduced airway distensibility, fixed airflow limitation, and airway wall remodeling in asthma. *Am J Respir Crit Care Med.* 2001;164(9):1718-21.
17. Jackson AC, Tennhoff W, Kraemer R, Frey U. Airway and tissue resistance in wheezy infants: effects of albuterol. *Am J Respir Crit Care Med.* 1999;160(2):557-63.

18. Hantos Z, Czovek D, Gyurkovits Z, Szabo H, Maar BA, Radics B, et al. Assessment of respiratory mechanics with forced oscillations in healthy newborns. *Pediatr Pulmonol.* 2015;50(4):344-52.
19. Gray D, Czovek D, Smith E, Willemse L, Alberts A, Gingl Z, et al. Respiratory impedance in healthy unsedated South African infants: effects of maternal smoking. *Respirology.* 2015;20(3):467-73.
20. Gray D, Willemse L, Visagie A, Czovek D, Nduru P, Vanker A, et al. Determinants of early-life lung function in African infants. *Thorax.* 2017;72(5):445-50.
21. Gray DM, Czovek D, McMillan L, Turkovic L, Stadler JAM, Vanker A, et al. Intra-breath measures of respiratory mechanics in healthy African infants detect risk of respiratory illness in early life. *Eur Respir J.* 2019;53(2).
22. Sly PD, Hantos Z. The International Collaboration to Improve Respiratory Health in Children (INCIRCLE) ERS Clinical Research Collaboration. *Eur Respir J.* 2018;52(6).
23. van den Elshout FJ, van de Woestijne KP, Folgering HT. Variations of respiratory impedance with lung volume in bronchial hyperreactivity. *Chest.* 1990;98(2):358-64.
24. Kelly VJ, Sands SA, Harris RS, Venegas JG, Brown NJ, Stuart-Andrews CR, et al. Respiratory system reactance is an independent determinant of asthma control. *J Appl Physiol.* 2013;115(9):1360-9.
25. Veneroni C, Van Muylem A, Malinovski A, Michils A, Dellaca RL. Closing volume detection by single breath gas washout and forced oscillation technique. *J Appl Physiol* (1985). 2021.



26. Jackson AC, Murphy MM, Rassulo J, Celli BR, Ingram RH, Jr. Deep breath reversal and exponential return of methacholine-induced obstruction in asthmatic and nonasthmatic subjects. *J Appl Physiol* (1985). 2004;96(1):137-42.
27. Goldman MD, Carter R, Klein R, Fritz G, Carter B, Pachucki P. Within- and between-day variability of respiratory impedance, using impulse oscillometry in adolescent asthmatics. *Pediatr Pulmonol*. 2002;34(4):312-9.
28. Timmins SC, Coatsworth N, Palnitkar G, Thamrin C, Farrow CE, Schoeffel RE, et al. Day-to-day variability of oscillatory impedance and spirometry in asthma and COPD. *Respir Physiol Neurobiol*. 2013;185(2):416-24.
29. Que CL, Kenyon CM, Olivenstein R, Macklem PT, Maksym GN. Homeokinesis and short-term variability of human airway caliber. *J Appl Physiol*. 2001;91(3):1131-41.
30. Gonem S, Umar I, Burke D, Desai D, Corkill S, Owers-Bradley J, et al. Airway impedance entropy and exacerbations in severe asthma. *Eur Respir J*. 2012;40(5):1156-63.
31. Diba C, Salome CM, Reddel HK, Thorpe CW, Toelle B, King GG. Short-term variability of airway caliber-a marker of asthma? *J Appl Physiol*. 2007;103(1):296-304.
32. Veiga J, Lopes AJ, Jansen JM, Melo PL. Fluctuation analysis of respiratory impedance waveform in asthmatic patients: effect of airway obstruction. *Med Biol Eng Comput*. 2012;50(12):1249-59.
33. [www.ginasthma.org](http://www.ginasthma.org) Af. Global Strategy for Asthma Management and Prevention (2017 update). 2017.
34. Dellaca RL, Gobbi A, Pastena M, Pedotti A, Celli B. Home monitoring of within-breath respiratory mechanics by a simple and automatic forced oscillation technique device. *Physiol Meas*. 2010;31(4):N11-24.

35. Rigau J, Burgos F, Hernandez C, Roca J, Navajas D, Farre R. Unsupervised self-testing of airway obstruction by forced oscillation at the patient's home. *Eur Respir J*. 2003;22(4):668-71.
36. Rigau J, Farre R, Roca J, Marco S, Herms A, Navajas D. A portable forced oscillation device for respiratory home monitoring. *Eur Respir J*. 2002;19(1):146-50.
37. Robinson PD, Brown NJ, Turner M, Van Asperen P, Selvadurai H, King GG. Increased Day-To-Day Variability of Forced Oscillatory Resistance in Poorly Controlled or Persistent Paediatric Asthma. *Chest*. 2014;146(4):974-81.
38. Gobbi A, Dellacà R, King GG, Thamrin C. Towards predicting individual risk in asthma using daily home monitoring of resistance. *American Journal of Respiratory and Critical Care Medicine*. 2017;195(2):265-7.
39. Gulotta C, Suki B, Brusasco V, Pellegrino R, Gobbi A, Pedotti A, et al. Monitoring the Temporal Changes of Respiratory Resistance: A Novel Test for the Management of Asthma. *American Journal of Respiratory and Critical Care Medicine*. 2012;185(12):1330-1.
40. Wong A, Hardaker K, Field P, Huvanandana J, King GG, Reddel H, et al. Home-based Forced Oscillation Technique Day-to-Day Variability in Pediatric Asthma. *Am J Respir Crit Care Med*. 2019;199(9):1156-60.
41. Gobbi A, Pastena M, Pedotti A, Celli B, RL D. Home monitoring of within-breath respiratory mechanics by a simple and automatic forced oscillation technique device. *Physiol Meas*. 2010;31:N11-24.
42. Gobbi A, Gulotta C, Suki B, Mellano E, Pellegrino R, Brusasco V, et al. Monitoring of respiratory resistance in the diagnosis of mild intermittent asthma. *Clin Exp Allergy*. 2019;49(6):921-3.

43. Timmins SC, Diba C, Schoeffel RE, Salome CM, King GG, Thamrin C. Changes in oscillatory impedance and nitrogen washout with combination fluticasone/salmeterol therapy in COPD. *Respir Med.* 2014;108:344-50.
44. Farré R, Rotger M, Marchal F, Peslin R, Navajas D. Assessment of bronchial reactivity by forced oscillation admittance avoids the upper airway artefact. *Eur Respir J.* 1999;13(4):761-6.
45. Simpson SJ, Straszek SP, Sly PD, Stick SM, Hall GL. Clinical investigation of respiratory system admittance in preschool children. *Pediatric Pulmonology.* 2012;47(1):53-8.
46. Zimmermann SC, Huvanandana J, Nguyen CD, Bertolin A, Watts JC, Gobbi A, et al. Day-to-day variability of forced oscillatory mechanics for early detection of acute exacerbations in COPD. *Eur Respir J.* 2020;56(3):1901739.
47. Timmins SC, Diba C, Thamrin C, Berend N, Salome CM, King GG. The feasibility of home monitoring of impedance with the forced oscillation technique in chronic obstructive pulmonary disease subjects. *Physiol Meas.* 2013;34:67-81.
48. Walker PP, Pompilio PP, Zanaboni P, Bergmo TS, Prikk K, Malinovschi A, et al. Telemonitoring in Chronic Obstructive Pulmonary Disease (CHROMED). A Randomized Clinical Trial. *Am J Respir Crit Care Med.* 2018;198(5):620-8.
49. Farre R, Rigau J, Montserrat JM, Ballester E, Navajas D. Evaluation of a simplified oscillation technique for assessing airway obstruction in sleep apnoea. *Eur Respir J.* 2001;17(3):456-61.
50. Navajas D, Duvivier C, Farre R, Peslin R. A simplified method for monitoring respiratory impedance during continuous positive airway pressure. *European Respiratory Journal.* 2000;15(1):185-91.

51. Farre R, Rotger M, Montserrat JM, Navajas D. A system to generate simultaneous forced oscillation and continuous positive airway pressure. *Eur Respir J*. 1997;10(6):1349-53.
52. Badia JR, Farre R, Rigau J, Uribe ME, Navajas D, Montserrat JM. Forced oscillation measurements do not affect upper airway muscle tone or sleep in clinical studies. *Eur Respir J*. 2001;18(2):335-9.
53. Rigau J, Montserrat JM, Wohrle H, Plattner D, Schwaibold M, Navajas D, et al. Bench model to simulate upper airway obstruction for analyzing automatic continuous positive airway pressure devices. *Chest*. 2006;130(2):350-61.
54. Galetke W, Randerath WJ, Stieglitz S, Laumanns C, Anduleit N, Richter K, et al. Comparison of manual titration and automatic titration based on forced oscillation technique, flow and snoring in obstructive sleep apnea. *Sleep Med*. 2009;10(3):337-43.
55. Herkenrath SD, Treml M, Anduleit N, Richter K, Pietzke-Calcagnile A, Schwaibold M, et al. Extended evaluation of the efficacy of a proactive forced oscillation technique-based auto-CPAP algorithm. *Sleep Breath*. 2019.
56. Lutchen KR, Kaczka DW, Suki B, Barnas G, Cevenini G, Barbini P. Low-frequency respiratory mechanics using ventilator-driven forced oscillations. *J Appl Physiol*. 1993;75(6):2549-60.
57. Barbini P, Cevenini G, Lutchen KR, Ursino M. Estimating respiratory mechanical parameters of ventilated patients: a critical study in the routine intensive-care unit. *Med Biol Eng Comput*. 1994;32(2):153-60.
58. Lutchen KR. Optimal selection of frequencies for estimating parameters from respiratory impedance data. *IEEE Transactions on Biomedical Engineering*. 1988;35(8):607-17.

59. Suki B, Lutchen KR. Pseudorandom signals to estimate apparent transfer and coherence functions of nonlinear systems: applications to respiratory mechanics. *IEEE Transactions on Biomedical Engineering*. 1992;39(11):1142-51.
60. Kaczka DW, Ingenito EP, Lutchen KR. Technique to determine inspiratory impedance during mechanical ventilation: implications for flow-limited patients. *Annals of Biomedical Engineering*. 1999;27:340-55.
61. Kaczka DW, Herrmann J, Zonneveld CE, Tingay DG, Lavizzari A, Noble PB, et al. Multifrequency Oscillatory Ventilation in the Premature Lung: Effects on Gas Exchange, Mechanics, and Ventilation Distribution. *Anesthesiology*. 2015;123(6):1394-403.
62. Al-Alwan A, Bates JH, Chapman DG, Kaminsky DA, DeSarno MJ, Irvin CG, et al. The nonallergic asthma of obesity. A matter of distal lung compliance. *Am J Respir Crit Care Med*. 2014;189(12):1494-502.
63. Turner MJ, MacLeod IM, Rothberg AD. Calibration of Fleisch and screen pneumotachographs for use with various oxygen concentrations. *Medical & Biological Engineering & Computing*. 1990;28:200-4.
64. Habre W, Asztalos T, Sly PD, Petak F. Viscosity and density of common anaesthetic gases: implications for flow measurements. *British Journal of Anaesthesia*. 2001;87(4):602-7.
65. Mondonedo JR, Herrmann J, McNeil JS, Kaczka DW. Comparison of pneumotachography and anemometry for flow measurement during mechanical ventilation with volatile anesthetics. *J Clin Monit Comput*. 2017;31(6):1263-71.
66. Navajas D, Farre R, Rotger M, Canet J. Recording pressure at the distal end of the endotracheal tube to measure respiratory impedance. *Eur Respir J*. 1989;2:178-84.

67. Navalesi P, Hernandez P, Laporta D, Landry JS, Maltais F, Navajas D, et al. Influence of site of tracheal pressure measurement on in situ estimation of endotracheal tube resistance. *J Appl Physiol.* 1994;77(6):2899-906.
68. Sly PD, Brown KA, Bates JH, Spier S, Milic-Emili J. Noninvasive determination of respiratory mechanics during mechanical ventilation of neonates: a review of current and future techniques. *Pediatr Pulmonol.* 1988;4(1):39-47.
69. Hellinckx J, De Boeck K, Bande-Knops J, van der Poel M, Demedts M. Bronchodilator response in 3-6.5 years old healthy and stable asthmatic children. *Eur Respir J.* 1998;12(2):438-43.
70. Malmberg LP, Pelkonen A, Poussa T, Pohjanpalo A, Haahtela T, Turpeinen M. Determinants of respiratory system input impedance and bronchodilator response in healthy Finnish preschool children. *Clinical Physiology and Functional Imaging.* 2002;22(1):64-71.
71. Shackleton C, Barraza-Villarreal A, Chen L, Gangell CL, Romieu I, Sly PD. Reference Ranges for Mexican Preschool-Aged Children Using the Forced Oscillation Technique. *Archivos de Bronconeumología (English Edition).* 2013.
72. Er İ, Günlemez A, Baydemir C, Kılıçbay F, Ersu R, Uyan ZS. Impulse oscillometry reference values and correlation with predictors in Turkish preschool children. *Turk J Pediatr.* 2019;61(4):560-7.
73. Duenas-Meza E, Correa E, López E, Morales JC, Aguirre-Franco CE, Morantes-Ariza CF, et al. Impulse oscillometry reference values and bronchodilator response in three- to five-year old children living at high altitude. *J Asthma Allergy.* 2019;12:263-71.

74. Frei J, Jutla J, Kramer G, Hatzakis GE, Ducharme FM, Davis GM. Impulse Oscillometry: Reference values in children 100 to 150 cm in height and 3 to 10 years of age. *CHEST*. 2005;128(3):1266-73.
75. Ducharme FM, Davis GM, Ducharme GR. Pediatric reference values for respiratory resistance measured by forced oscillation. *Chest*. 1998;113(5):1322-8.
76. Dencker M, Malmberg LP, Valind S, Thorsson O, Karlsson MK, Pelkonen A, et al. Reference values for respiratory system impedance by using impulse oscillometry in children aged 2–11 years. *Clinical Physiology and Functional Imaging*. 2006;26(4):247-50.
77. Amra B, Soltaninejad F, Golshan M. Respiratory resistance by impulse oscillometry in healthy Iranian children aged 5-19 years. *Iran J Allergy Asthma Immunol*. 2008;7(1):25-9.
78. Vu LT, Demoulin B, Nguyen YT, Nguyen MT, Marchal F. Respiratory impedance and response to salbutamol in healthy Vietnamese children. *Pediatr Pulmonol*. 2008;43(10):1013-9.
79. Nowowiejska B, Tomalak W, Radliński J, Siergiejko G, Latawiec W, Kaczmarek M. Transient reference values for impulse oscillometry for children aged 3–18 years. *Pediatric Pulmonology*. 2008;43(12):1193-7.
80. Hagiwara S, Mochizuki H, Muramatsu R, Koyama H, Yagi H, Nishida Y, et al. Reference values for Japanese children's respiratory resistance using the LMS method. *Allergol Int*. 2014;63(1):113-9.
81. Calogero C, Simpson SJ, Lombardi E, Parri N, Cuomo B, Palumbo M, et al. Respiratory impedance and bronchodilator responsiveness in healthy children aged 2–13 years. *Pediatric Pulmonology*. 2013;48(7):707-15.

82. Gochicoa-Rangel L, Torre-Bouscoulet L, Martinez-Briseno D, Rodriguez-Moreno L, Cantu-Gonzalez G, Vargas MH. Values of impulse oscillometry in healthy mexican children and adolescents. *Respiratory care*. 2015;60(1):119-27.
83. Kanokporn U, Wichuta S, Akarin N, Chulaluk K. Respiratory Impedance Reference Values for Forced Oscillation Technique Predicted by Arm Span and Height in Thai Preschool Children. *Pediatric Allergy, Immunology, and Pulmonology*. 2017;30(2):97-102.
84. Landser FJ, Clement J, Van de Woestijne KP. Normal values of total respiratory resistance and reactance determined by forced oscillations: influence of smoking. *Chest*. 1982;81(5):586-91.
85. Pasker HG, Schepers R, Clement J, Van de Woestijne KP. Total respiratory impedance measured by means of the forced oscillation technique in subjects with and without respiratory complaints. *Eur Respir J*. 1996;9(1):131-9.
86. Guo YF, Herrmann F, Michel J-P, Janssens J-P. Normal values for respiratory resistance using forced oscillation in subjects >65 years old. *European Respiratory Journal*. 2005;26(4):602-8.
87. Shiota S, Katoh M, Fujii M, Aoki S, Matsuoka R, Fukuchi Y. Predictive equations and the reliability of the impulse oscillatory system in Japanese adult subjects. *Respirology*. 2005;10(3):310-5.
88. Brown NJ, Xuan W, Salome CM, Berend N, Hunter ML, Musk AW, et al. Reference equations for respiratory system resistance and reactance in adults. *Respir Physiol Neurobiol*. 2010;172(3):162-8.
89. Newbury W, Crockett A, Newbury J. A pilot study to evaluate Australian predictive equations for the impulse oscillometry system. *Respirology*. 2008;13(7):1070-5.



90. Oostveen E, Boda K, van der Grinten CP, James AL, Young S, Nieland H, et al. Respiratory impedance in healthy subjects: baseline values and bronchodilator response. *Eur Respir J*. 2013;42(6):1513-23.
91. Schulz H, Flexeder C, Behr J, Heier M, Holle R, Huber R, et al. Reference Values of Impulse Oscillometric Lung Function Indices in Adults of Advanced Age. *PLoS One*. 2013;8(5):e63366.
92. Abe Y, Shibata Y, Igarashi A, Inoue S, Sato K, Sato M, et al. Reference values of MostGraph measures for middle-aged and elderly Japanese individuals who participated in annual health checkups. *Respir Investig*. 2016;54(3):148-55.
93. Ribeiro FCV, Lopes AJ, Melo PL. Reference values for respiratory impedance measured by the forced oscillation technique in adult men and women. *Clin Respir J*. 2018;12:2126-35.
94. Moitra S, Moitra S, Ghosh AK, Sengupta S, Das PK, Das A, et al. Reference values of impulse oscillometry (IOS) for healthy Indian adults. *Int J Tuberc Lung Dis*. 2020;24(5):536-9.
95. De S, Banerjee N, Kushwah GDS, Dharwey D. Regression equations of respiratory impedance of Indian adults measured by forced oscillation technique. *Lung India*. 2020;37(1):30-6.
96. Berger K, Wohlleber M, Goldring R, Reibman J, Rarfel M, Friedman S, et al. Respiratory Impedance Measured Using Impulse Oscillometry in a Healthy Urban Population. *ERJ Open Research*. 2021;7:00560-2020.
97. Nielsen KG, Bisgaard H. Discriminative capacity of bronchodilator response measured with three different lung function techniques in asthmatic and healthy children aged 2 to 5 years. *American journal of respiratory and critical care medicine*. 2001;164:554-9.

98. Thamrin C, Gangell CL, Udomittipong K, Kusel MMH, Patterson H, Fukushima T, et al. Assessment of bronchodilator responsiveness in preschool children using forced oscillations. *Thorax*. 2007;62(9):814-9.
99. Oostveen E, Dom S, Desager K, Hagendorens M, Backer W, Weyler J, et al. Lung function and bronchodilator response in 4-year-old children with different wheezing phenotypes. *Eur Respir J*. 2010;35:865-72.
100. Shin YH, Jang SJ, Yoon JW, Jee HM, Choi SH, Yum HY, et al. Oscillometric and spirometric bronchodilator response in preschool children with and without asthma. *Can Respir J*. 2012;19(4):273-7.
101. Houghton CM, Woodcock AA, Singh D. A comparison of lung function methods for assessing dose-response effects of salbutamol. *British Journal of Clinical Pharmacology*. 2004;58(2):134-41.
102. Houghton CM, Woodcock AA, Singh D. A comparison of plethysmography, spirometry and oscillometry for assessing the pulmonary effects of inhaled ipratropium bromide in healthy subjects and patients with asthma. *British Journal of Clinical Pharmacology*. 2005;59(2):152-9.
103. Johansson H, Wollmer P, Sundström J, Janson C, Malinowski A. Bronchodilator response in FOT parameters in middle-aged adults from SCAPIS: normal values and relationship to asthma and wheezing. *Eur Respir J*. 2021;58(3).
104. Jetmalani K, Brown N, Boustany C, Toelle B, Marks G, Abramson M, et al. Normal limits for oscillometric bronchodilator responses and relationships with clinical factors. *ERJ Open Res*. 2021;in press (<https://doi.org/10.1183/23120541.00439-2021>).

105. Lebecque P, Spier S, Lapierre JG, Lamarre A, Zinman R, Coates AL. Histamine challenge test in children using forced oscillation to measure total respiratory resistance. *Chest*. 1987;92(2):313-8.
106. Bouaziz N, Beyaert C, Gauthier R, Monin P, Peslin R, Marchal F. Respiratory system reactance as an indicator of the intrathoracic airway response to methacholine in children. *Pediatric Pulmonology*. 1996;22(1):7-13.
107. Jee HM, Kwak JH, Jung DW, Han MY. Useful Parameters of Bronchial Hyperresponsiveness Measured with an Impulse Oscillation Technique in Preschool Children. *Journal of Asthma*. 2010;47(3):227-32.
108. Bailly C, Crenesse D, Albertini M. Evaluation of impulse oscillometry during bronchial challenge testing in children. *Pediatric Pulmonology*. 2011;46(12):1209-14.
109. Schulze J, Smith H-J, Fuchs J, Herrmann E, Dressler M, Rose MA, et al. Methacholine challenge in young children as evaluated by spirometry and impulse oscillometry. *Respiratory Medicine*. 2012;106(5):627-34.
110. Jara-Gutierrez P, Aguado E, Del Potro MG, Fernandez-Nieto M, Mahillo I, Sastre J. Comparison of impulse oscillometry and spirometry for detection of airway hyperresponsiveness to methacholine, mannitol, and eucapnic voluntary hyperventilation in children. *Pediatr Pulmonol*. 2019;54(8):1162-72.
111. van Noord JA, Clement J, van de Woestijne KP, Demedts M. Total respiratory resistance and reactance as a measurement of response to bronchial challenge with histamine. *American Review of Respiratory Disease*. 1989;139(4):921-6.

112. Pairon J, Iwatsubo Y, Hubert C, Lorino H, Nouaigui H, Gharbi R, et al. Measurement of bronchial responsiveness by forced oscillation technique in occupational epidemiology. *European Respiratory Journal*. 1994;7(3):484-9.
113. Bohadana AB, Peslin R, Megherbi SE, Teculescu D, Sauleau EA, Wild P, et al. Dose-response slope of forced oscillation and forced expiratory parameters in bronchial challenge testing. *Eur Respir J*. 1999;13(2):295-300.
114. McClean MA, Htun C, King GG, Berend N, Salome CM. Cut-points for response to mannitol challenges using the forced oscillation technique. *Respir Med*. 2011;105(4):533-40.
115. Seccombe LM, Peters MJ, Buddle L, Farah CS. Exercise-Induced Bronchoconstriction Identified Using the Forced Oscillation Technique. *Front Physiol*. 2019;10:1411.
